# Supplementary material for: One-step synthesis of graphene/polyaniline hybrids by in situ intercalation polymerization and their electromagnetic properties
Source: Royal Society of Chemistry journal article supplement (doi:10.1039/c4nr01738b), 2014-01-01
Supplement: c4nr01738b1.pdf [file c4nr01738b1.pdf]

Supplementary material

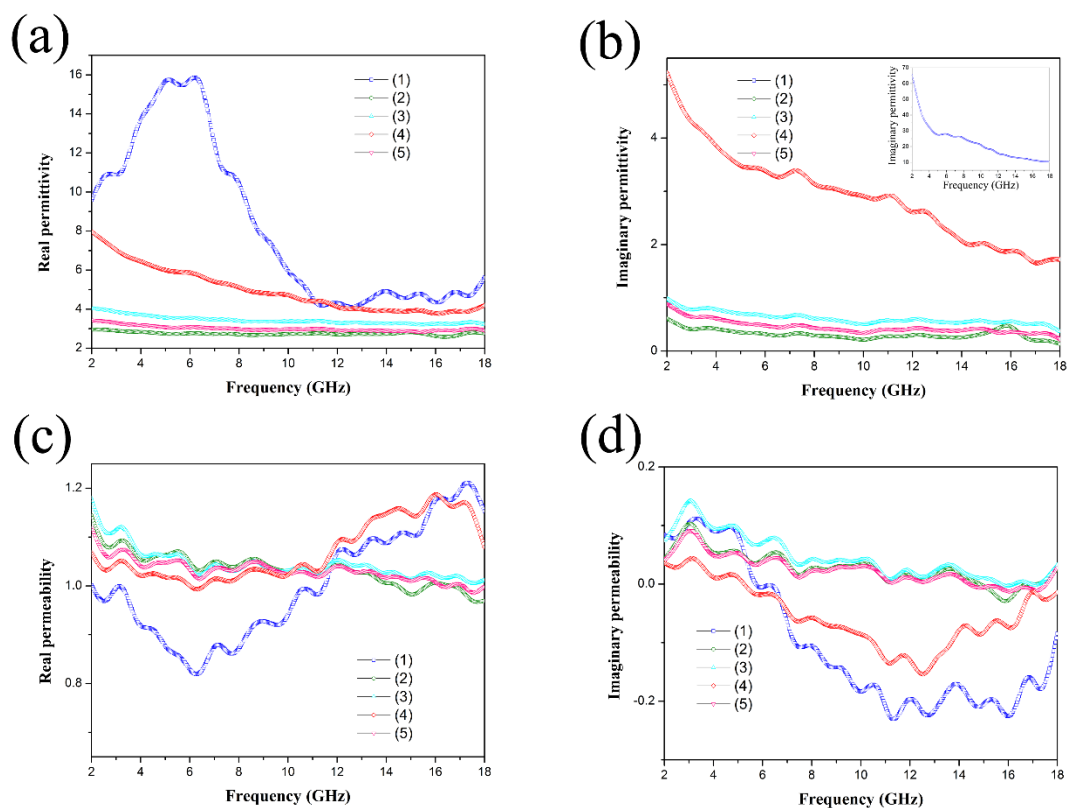

**Fig. S1** Measured frequency dependence of (a) real and (b) imaginary parts of complex permittivity and (c) real and (d) imaginary parts of permeability: (1) EG, (2) HCl-PANI, (3) PANi/EG-0, (4) PANi/EG-1, (5) PANi/EG-2.
